# Supplementary material for: A wearable and high-performance capacitive pressure sensor based on a biocompatible PVP nanofiber membrane via electrospinning and UV treatment
Source: Royal Society of Chemistry journal article supplement (doi:10.1039/d2tc00955b), 2022-01-01
Supplement: d2tc00955b1.pdf [file d2tc00955b1.pdf]

## Supplementary Information

### **A wearable and high-performance capacitive pressure sensor based on a biocompatible PVP nanofiber membrane via electrospinning and UV treatment**

*Mengna Ren,<sup>1</sup> Jiamin Li,<sup>1</sup> Luyu Lv,<sup>1</sup> Mengqi Zhang,<sup>1</sup> Xiaojun Yang,<sup>1</sup> Qihui Zhou,<sup>2,\*</sup> Danyang Wang,<sup>3</sup> Rajendra Dhakal,<sup>4</sup> Zhao Yao,<sup>1,\*</sup> Yuanyue Li,<sup>1,\*</sup> and Nam Young Kim<sup>5</sup>*

*<sup>1</sup>College of Electronic and Information, Qingdao University, Qingdao 266071, China*

*<sup>2</sup>Institute for Translational Medicine, The Affiliated Hospital of Qingdao University, Qingdao University, Qingdao 266003, China.*

*<sup>3</sup>Department of Stomatology, The Affiliated Hospital of Qingdao University, Qingdao University, Qingdao 266003, China.*

*<sup>4</sup>Department of Computer Science and Engineering, Sejong University, Seoul 05006, Korea*

*<sup>5</sup>Department of Electronic Engineering, Kwangwoon University, Seoul 01897, Korea*

---

\*corresponding author: [qihuizhou@qdu.edu.cn](mailto:qihuizhou@qdu.edu.cn) (Qihui Zhou); [yzh17@qdu.edu.cn](mailto:yzh17@qdu.edu.cn) (Zhao Yao); [yyli@qdu.edu.cn](mailto:yyli@qdu.edu.cn) (Yuanyue Li)

### 1. Figure S1

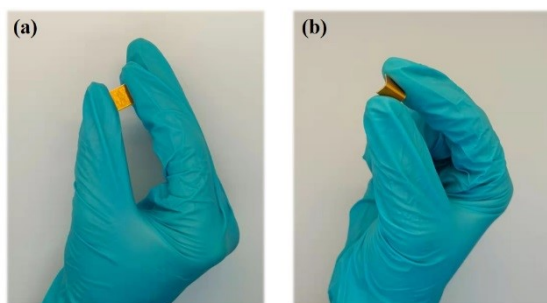

**Fig. S1.** Photographs of the fabricated pressure sensor: (a) capacitive pressure sensor with an area of  $1 \times 1 \text{ cm}^2$ ; (b) the above sensor in curved state.

### 2. Figure S2

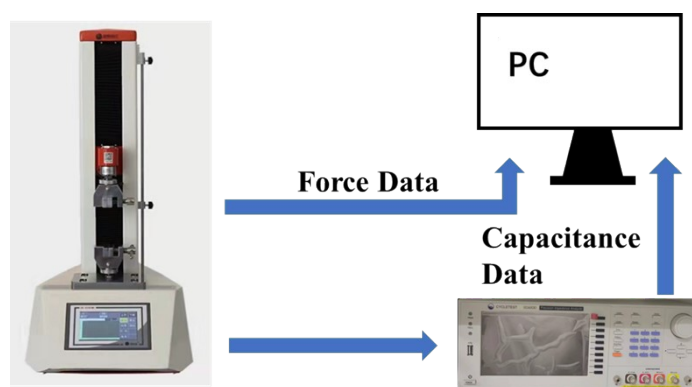

**Fig. S2.** Measurement setup: the data of the pressure and capacitance was recorded by using a PC.

### 3. Figure S3

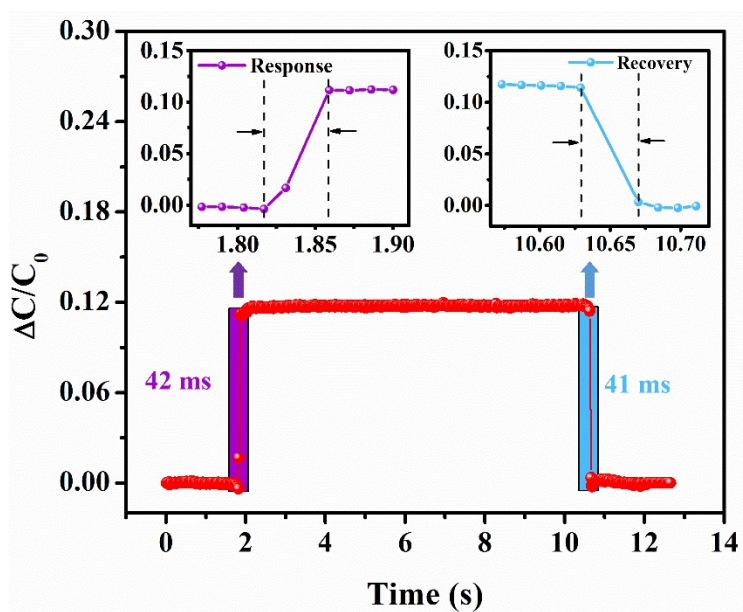

**Fig. S3.** Response and recovery time when a pressure of 100 kPa is applied to the S-UV-0.

#### 4. Finite Element Analysis

In the Finite Element Analysis (FEA), the specific parameters of the model were set as follows. The upper and lower electrodes were simulated as cuboids with the width of  $6.5\ \mu\text{m}$ , the depth of  $7\ \mu\text{m}$ , the height of  $1\ \mu\text{m}$ , and the material of copper ( $E = 126\ \text{GPa}$  and  $\nu = 0.34$ ). In order to simplify the model, the nanofiber network was simulated as the cross cylinder array for analysis. The parameters of the cylinders were set as follows. The length of all the cylinders was set to be  $6\ \mu\text{m}$ , and the interval between the cylinders was  $800\ \text{nm}$ . The average diameter of the cylinders was set as  $507, 700, 905, 1086, 1295\ \text{nm}$  in turn to make performance analysis, as shown in Fig. S4. At last, using the cylinders with the average diameter of  $700\ \text{nm}$  as model, their Young's modulus was set as  $60.5, 70.5, 80.5, 90.5$  and  $100.5\ \text{MPa}$  in turn, as shown in Fig. S5.

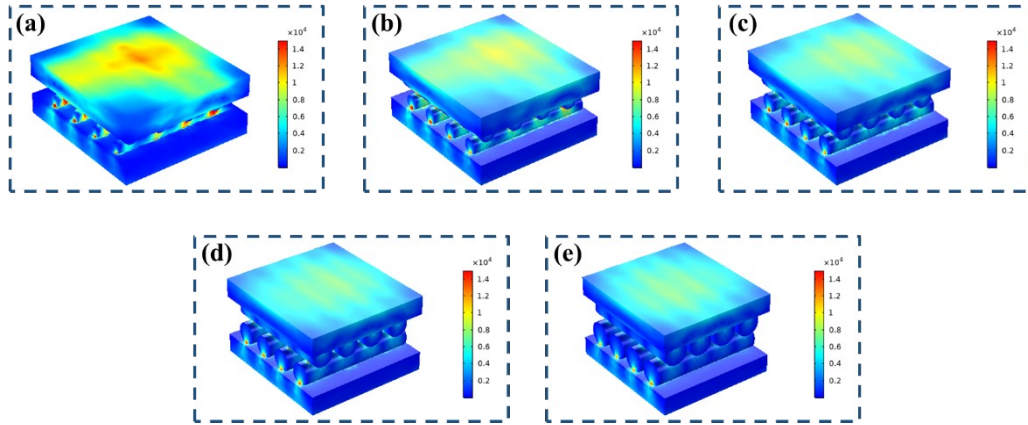

**Fig. S4.** Contact stress distribution images of the sensors based on the nanofibers with the average diameter of (a)  $507$ , (b)  $700$ , (c)  $905$ , (d)  $1086$  and (e)  $1295\ \text{nm}$ , respectively.

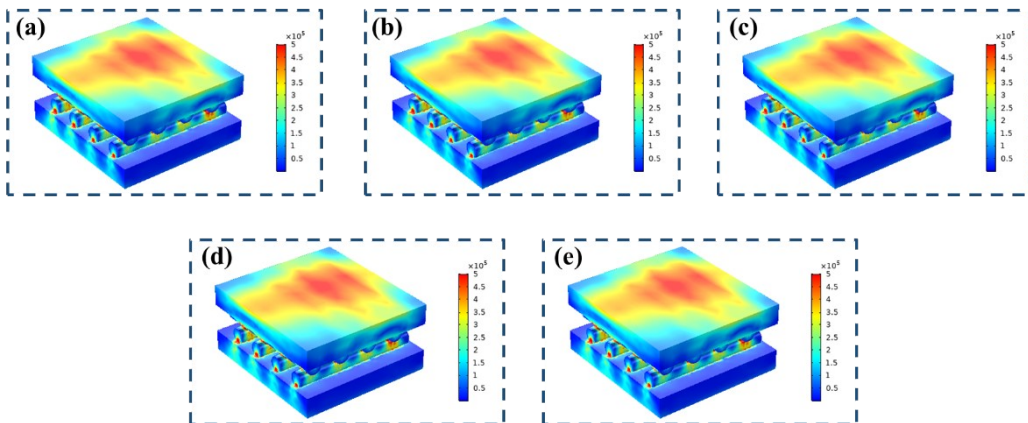

**Fig. S5.** Contact stress distribution images of the sensors based on the nanofibers with the Young's modulus of (a)  $60.5$ , (b)  $70.5$ , (c)  $80.5$ , (d)  $90.5$  and (e)  $100.5\ \text{MPa}$ , respectively.

## 5. Detailed data of the sensor array

The capacitance changes after placing “Q”, “D” and “U” are shown in Table S1, S2 and S3. The  $4 \times 4$  sensor array has 16 positions and their numbers are shown in Fig. S6.

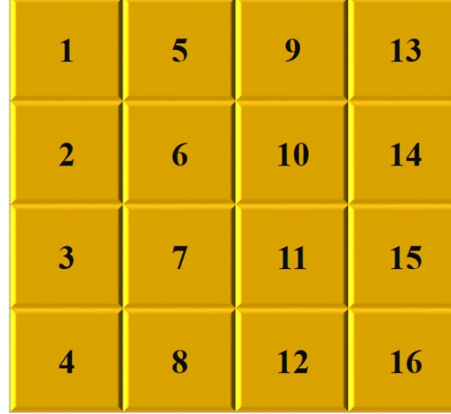

**Fig. S6.** Schematic diagram of the position number of the  $4 \times 4$  sensor array

**Table S1** Capacitance changes at each position of the sensor array after placing “Q”.

| Position | Initial capacitive (pF) | Loading capacitance (pF) | $\Delta C/C_0$ |
|----------|-------------------------|--------------------------|----------------|
| 1        | 6.79109                 | 7.05111                  | 0.038288       |
| 2        | 7.138988                | 7.593771                 | 0.063704       |
| 3        | 8.23229                 | 8.847513                 | 0.074732       |
| 4        | 5.607336                | 5.787492                 | 0.032128       |
| 5        | 6.525583                | 6.754044                 | 0.035010       |
| 6        | 6.867211                | 6.867218                 | 0              |
| 7        | 6.487735                | 6.663241                 | 0.027052       |
| 8        | 5.612323                | 6.029286                 | 0.074294       |
| 9        | 7.647986                | 7.932999                 | 0.037266       |
| 10       | 7.720876                | 8.294289                 | 0.074267       |
| 11       | 7.214772                | 7.758816                 | 0.075406       |
| 12       | 6.923142                | 7.519799                 | 0.086183       |
| 13       | 7.238542                | 7.238542                 | 0              |
| 14       | 8.444439                | 8.444439                 | 0              |
| 15       | 8.24601                 | 8.24601                  | 0              |
| 16       | 7.660295                | 7.660295                 | 0              |

**Table S2** Capacitance changes at each position of the sensor array after placing “D”.

| Position | Initial capacitive (pF) | Loading capacitance (pF) | $\Delta C/C_0$ |
|----------|-------------------------|--------------------------|----------------|
| 1        | 6.79109                 | 7.304510                 | 0.075602       |
| 2        | 7.138988                | 7.675241                 | 0.075116       |
| 3        | 8.23229                 | 8.90558                  | 0.081786       |
| 4        | 5.607336                | 6.033706                 | 0.07603        |
| 5        | 6.525583                | 6.922801                 | 0.06087        |
| 6        | 6.867211                | 6.867211                 | 0              |
| 7        | 6.487735                | 6.487735                 | 0              |
| 8        | 5.612323                | 6.05554                  | 0.078972       |
| 9        | 7.647986                | 7.896525                 | 0.032497       |
| 10       | 7.720876                | 8.199236                 | 0.061956       |
| 11       | 7.214772                | 7.837699                 | 0.086340       |
| 12       | 6.923142                | 7.126366                 | 0.029354       |
| 13       | 7.238542                | 7.238542                 | 0              |
| 14       | 8.444439                | 8.444439                 | 0              |
| 15       | 8.24601                 | 8.24601                  | 0              |
| 16       | 7.660295                | 7.660295                 | 0              |

**Table S3** Capacitance changes at each position of the sensor array after placing “U”.

| Position | Initial capacitive (pF) | Loading capacitance (pF) | $\Delta C/C_0$ |
|----------|-------------------------|--------------------------|----------------|
| 1        | 6.79109                 | 7.146528                 | 0.035602       |
| 2        | 7.138988                | 7.635568                 | 0.075116       |
| 3        | 5.607336                | 5.827056                 | 0.076037       |
| 4        | 8.23229                 | 8.836831                 | 0.081786       |
| 5        | 6.525583                | 6.525580                 | 0              |
| 6        | 6.867211                | 6.867208                 | 0              |
| 7        | 6.487735                | 6.487735                 | 0              |
| 8        | 5.612323                | 6.049782                 | 0.078972       |
| 9        | 7.647986                | 8.016589                 | 0.032497       |
| 10       | 7.720876                | 8.302615                 | 0.061956       |
| 11       | 7.214772                | 7.704786                 | 0.086340       |
| 12       | 6.923142                | 7.744786                 | 0.029354       |
| 13       | 7.238542                | 7.238541                 | 0              |
| 14       | 8.444439                | 8.444437                 | 0              |
| 15       | 8.24601                 | 8.246015                 | 0              |
| 16       | 7.660295                | 7.660299                 | 0              |
